# Supplementary material for: A Systematic Review of Prophylactic Anticoagulation in Nephrotic Syndrome
Source: PubMed Central journal article supplement — Kidney Int Rep. 2019 Dec 12;5(4):435–47. doi: 10.1016/j.ekir.2019.12.001 (PMC7136344; doi:10.1016/j.ekir.2019.12.001), 2019-12-12
Supplement: mmc1.pdf [file mmc1.pdf]

## Supplementary Material

| Variable                                                               | Score                 |
|------------------------------------------------------------------------|-----------------------|
| Hypertension                                                           | 1                     |
| Renal Disease (dialysis, transplant, Cr>200µmol/L)                     | 1                     |
| Liver Disease (cirrhosis, bilirubin >2x, ALT/AST/ALP >3xULN)           | 1                     |
| Stroke History                                                         | 1                     |
| Prior major bleeding or predisposition to bleeding                     | 1                     |
| Labile INR (High INR, time in therapeutic range <60%)                  | 1                     |
| Elderly (>65years)                                                     | 1                     |
| Medication use predisposing to bleeding (aspirin, clopidogrel, NSAIDs) | 1                     |
| Alcohol use (≥8 standard drinks/week)                                  | 1                     |
| Total Score                                                            | Risk of Bleeding      |
| 0                                                                      | 0.9% (Low)            |
| 1                                                                      | 3.4% (Relatively Low) |
| 2                                                                      | 4.1% (Moderate)       |
| 3                                                                      | 5.8% (High)           |
| 4                                                                      | 8.9% (High)           |
| 5                                                                      | 9.1% (High)           |
| >5                                                                     | Very High             |

**Table S1:** HAS-BLED scoring system for risk of bleeding with anticoagulation. (Cr = creatinine, ALT = alanine transaminase, AST = aspartate transaminase, ALP = alkaline phosphatase, INR = international normalized ratio, NSAIDs = non-steroidal anti-inflammatory drugs, ULN = upper limit of normal)
